# Supplementary material for: Small droplet emission in exhaled breath during different breathing manoeuvres: Implications for clinical lung function testing during COVID‐19
Source: PubMed Central journal article supplement (PMC7537081; doi:10.1111/all.14596), 2020-10-06

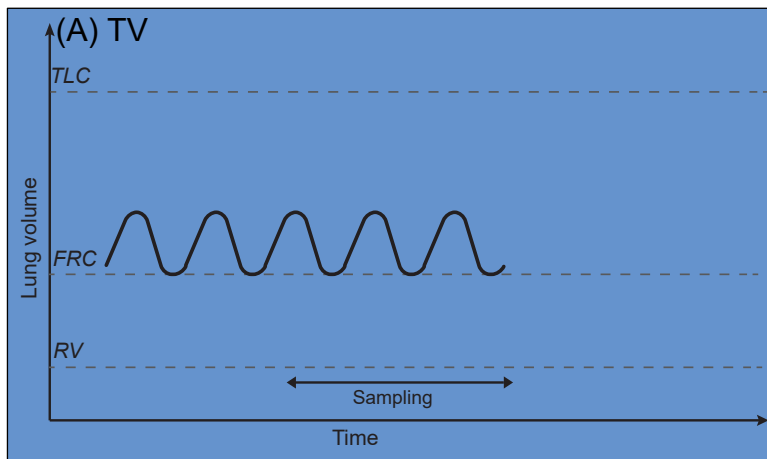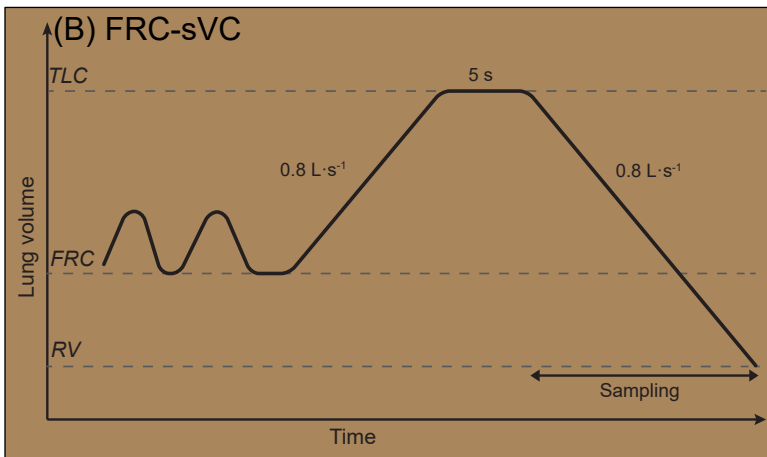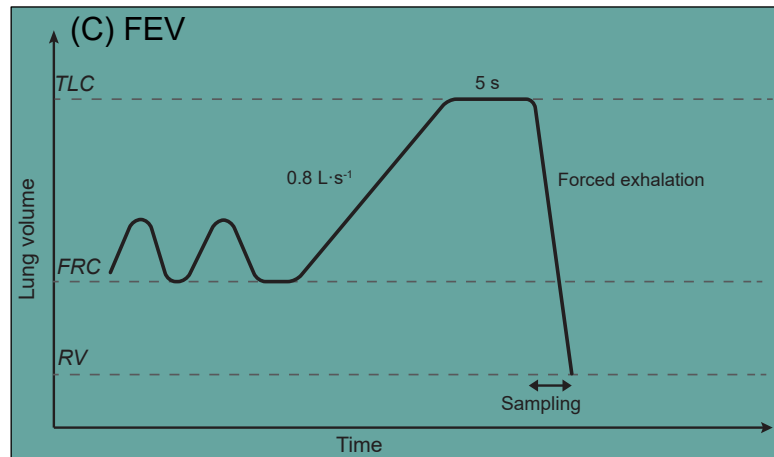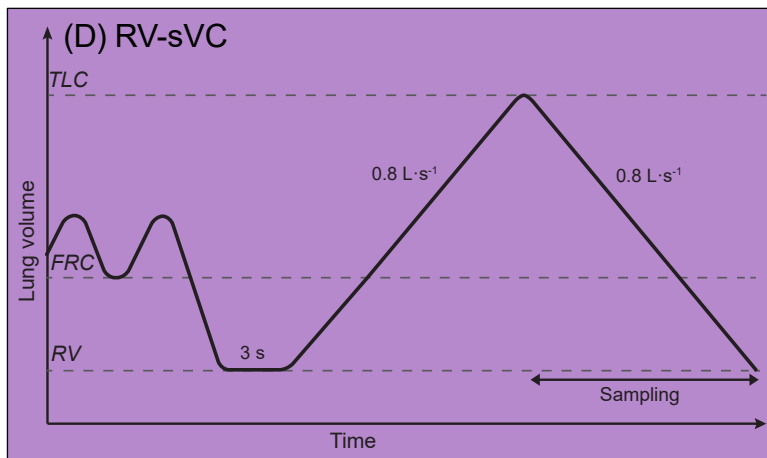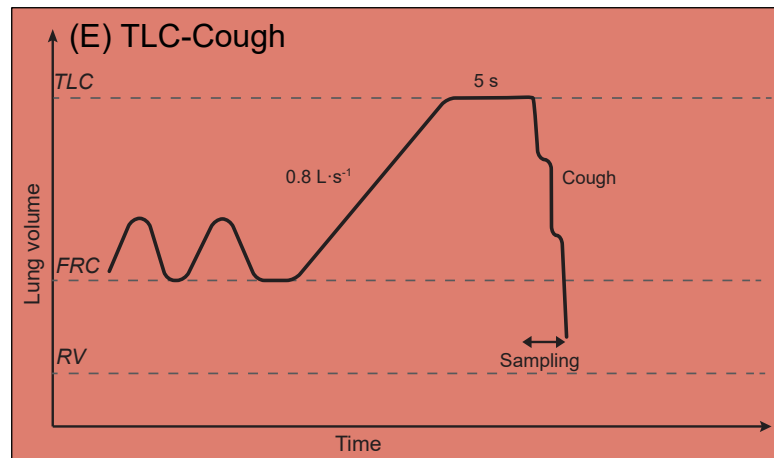

Supplement: ALL-76-915-s001.pdf [file ALL-76-915-s001.pdf]
